# Supplementary material for: State-level prevalence, health service use, and spending vary widely among Medicare beneficiaries with Parkinson disease
Source: PubMed Central journal article supplement (PMC6345811; doi:10.1038/s41531-019-0074-8), 2019-01-24
Supplement: 41531_2019_74_MOESM1_ESM.pdf [file 41531_2019_74_MOESM1_ESM.pdf]

**E-Table 1. Comparison of State-Level Prevalence Estimates**

| State                | PD Prevalence (per 100, 000) |             |                                                |
|----------------------|------------------------------|-------------|------------------------------------------------|
|                      | Ages 65+ *                   | Ages 45+ ** | Prevalence estimate ratio<br>(Age 65+/Age 45+) |
| Alabama              | 1,140.4                      | 577.6       | 1.97                                           |
| Alaska               | 935.0                        | 450.3       | 2.08                                           |
| Arizona              | 1,173.2                      | 632.1       | 1.86                                           |
| Arkansas             | 1,069.4                      | 602.4       | 1.78                                           |
| California           | 1,350.7                      | 558.7       | 2.42                                           |
| Colorado             | 1,118.7                      | 534.0       | 2.09                                           |
| Connecticut          | 1,479.0                      | 578.9       | 2.55                                           |
| Delaware             | 1,102.3                      | 596.8       | 1.85                                           |
| District of Columbia | 1,114.8                      | 547.0       | 2.04                                           |
| Florida              | 1,469.1                      | 668.5       | 2.20                                           |
| Georgia              | 1,054.5                      | 514.0       | 2.05                                           |
| Hawaii               | 1,149.3                      | 635.4       | 1.81                                           |
| Idaho                | 992.1                        | 593.1       | 1.67                                           |
| Illinois             | 1,418.0                      | 566.8       | 2.50                                           |
| Indiana              | 1,278.1                      | 571.8       | 2.24                                           |
| Iowa                 | 1,273.5                      | 627.3       | 2.03                                           |
| Kansas               | 1,362.4                      | 602.6       | 2.26                                           |
| Kentucky             | 1,122.6                      | 565.5       | 1.99                                           |
| Louisiana            | 1,181.4                      | 557.9       | 2.12                                           |
| Maine                | 1,061.4                      | 604.6       | 1.76                                           |
| Maryland             | 1,227.8                      | 544.8       | 2.25                                           |
| Massachusetts        | 1,249.2                      | 577.4       | 2.16                                           |
| Michigan             | 1,169.5                      | 581.0       | 2.01                                           |
| Minnesota            | 1,195.8                      | 582.2       | 2.05                                           |
| Mississippi          | 1,004.9                      | 571.3       | 1.76                                           |
| Missouri             | 1,251.1                      | 595.0       | 2.10                                           |
| Montana              | 924.8                        | 621.2       | 1.49                                           |
| Nebraska             | 1,336.8                      | 608.9       | 2.20                                           |
| Nevada               | 1,112.2                      | 557.1       | 2.00                                           |
| New Hampshire        | 1,149.7                      | 561.5       | 2.05                                           |
| New Jersey           | 1,414.9                      | 566.7       | 2.50                                           |
| New Mexico           | 898.8                        | 607.0       | 1.48                                           |
| New York             | 1,535.6                      | 579.9       | 2.65                                           |
| North Carolina       | 1,018.1                      | 562.5       | 1.81                                           |
| North Dakota         | 1,289.8                      | 623.9       | 2.07                                           |
| Ohio                 | 1,231.1                      | 589.5       | 2.09                                           |
| Oklahoma             | 1,052.6                      | 591.8       | 1.78                                           |
| Oregon               | 980.7                        | 601.7       | 1.63                                           |
| Pennsylvania         | 1,385.6                      | 614.4       | 2.25                                           |
| Rhode Island         | 1,255.8                      | 596.8       | 2.10                                           |
| South Carolina       | 1,018.2                      | 577.2       | 1.76                                           |
| South Dakota         | 1,167.8                      | 626.7       | 1.86                                           |
| Tennessee            | 1,245.9                      | 568.3       | 2.19                                           |
| Texas                | 1,350.1                      | 526.0       | 2.57                                           |
| Utah                 | 1,218.8                      | 546.9       | 2.23                                           |
| Vermont              | 999.3                        | 590.3       | 1.69                                           |
| Virginia             | 1,196.2                      | 548.8       | 2.18                                           |

|                      |         |       |      |
|----------------------|---------|-------|------|
| <b>Washington</b>    | 1,087.2 | 562.7 | 1.93 |
| <b>West Virginia</b> | 1,072.7 | 615.0 | 1.74 |
| <b>Wisconsin</b>     | 1,194.2 | 588.5 | 2.03 |
| <b>Wyoming</b>       | 814.0   | 577.8 | 1.41 |

**\*Sample consisting of individuals participating in the Medicare program.**

**\*\*Sample consisting of pooled data from the Medicare program, Rochester Epidemiology Project, California Parkinson's Disease Registry, Honolulu-Asia Aging Study, Kaiser Permanente Northern California.**

**E-Table 2. Medicare and Individual payments, PD vs. non-PD**

| Spending Category                   | Health Care Use<br>Payment/ Visit Type | Non-PD (n= 27,145,809) |                | PD (n=392,214) |                | p*    |
|-------------------------------------|----------------------------------------|------------------------|----------------|----------------|----------------|-------|
|                                     |                                        | Mean                   | Std. Deviation | Mean           | Std. Deviation |       |
| <b>Hospital<br/>Outpatient</b>      | Medicare Payments                      | 1231.57                | 4475.33        | 2246.24        | 5090.56        | <0.05 |
|                                     | Beneficiary Payments                   | 334.61                 | 1132.90        | 588.53         | 1207.86        | <0.05 |
|                                     | Other Payer Payments                   | 21.23                  | 3005.17        | 22.04          | 777.91         | NS    |
|                                     | Visits                                 | 5.49                   | 15.53          | 12.94          | 23.05          | <0.05 |
| <b>Acute Inpatient</b>              | Medicare Payments                      | 2228.28                | 9079.98        | 5369.08        | 13403.68       | <0.05 |
|                                     | Beneficiary Payments                   | 196.66                 | 625.00         | 484.01         | 998.97         | <0.05 |
|                                     | Other Payer Payments                   | 40.55                  | 2644.52        | 50.40          | 2115.92        | NS    |
|                                     | Per Diem Payments                      | 67.66                  | 623.27         | 178.54         | 975.42         | <0.05 |
|                                     | Covered Days                           | 1.03                   | 4.21           | 2.86           | 6.96           | <0.05 |
| <b>Other Inpatient</b>              | Medicare Payments                      | 305.25                 | 3466.09        | 1485.60        | 7590.82        | <0.05 |
|                                     | Beneficiary Payments                   | 12.34                  | 421.59         | 65.21          | 927.12         | <0.05 |
|                                     | Other Payer Payments                   | 1.59                   | 759.72         | 3.96           | 603.07         | NS    |
|                                     | Per Diem Payments                      | 0.29                   | 35.90          | 1.44           | 70.34          | <0.05 |
|                                     | Covered Days                           | 0.24                   | 2.67           | 1.21           | 6.12           | <0.05 |
| <b>Skilled Nursing<br/>Facility</b> | Medicare Payments                      | 748.51                 | 4405.29        | 3605.40        | 9763.14        | <0.05 |
|                                     | Beneficiary Payments                   | 148.84                 | 1115.03        | 794.92         | 2570.48        | <0.05 |
|                                     | Other Payer Payments                   | 0.60                   | 125.26         | 2.31           | 248.10         | <0.05 |
|                                     | Covered Days                           | 1.77                   | 10.39          | 8.58           | 23.07          | <0.05 |
| <b>Hospice</b>                      | Medicare Payments                      | 282.04                 | 3076.97        | 1195.88        | 6179.41        | <0.05 |
|                                     | Other Payer Payments                   | 0.13                   | 53.62          | 0.20           | 50.60          | NS    |
|                                     | Covered Days                           | 1.78                   | 19.90          | 7.51           | 39.71          | <0.05 |
| <b>Home Health</b>                  | Medicare Payments                      | 448.88                 | 1992.57        | 1979.92        | 4334.88        | <0.05 |
|                                     | Other Payer Payments                   | 0.16                   | 63.19          | 0.47           | 48.61          | NS    |
|                                     | Visits                                 | 2.79                   | 15.98          | 12.44          | 34.70          | <0.05 |
| <b>Ambulatory<br/>Surgery</b>       | Medicare Payments                      | 69.17                  | 407.76         | 85.18          | 569.95         | <0.05 |
|                                     | Beneficiary Payments                   | 17.65                  | 104.83         | 21.84          | 146.04         | <0.05 |
|                                     | Other Payer Payments                   | 0.97                   | 64.44          | 0.47           | 32.78          | <0.05 |
|                                     | Events                                 | 0.14                   | 0.65           | 0.17           | 0.73           | <0.05 |
| <b>Part B Drug</b>                  | Medicare Payments                      | 311.37                 | 2860.10        | 341.56         | 2473.47        | <0.05 |
|                                     | Beneficiary Payments                   | 75.65                  | 731.33         | 83.04          | 632.35         | <0.05 |
|                                     | Other Payer Payments                   | 1.75                   | 234.38         | 1.28           | 121.15         | <0.05 |
|                                     | Events                                 | 2.17                   | 5.86           | 2.98           | 5.65           | <0.05 |
| <b>E&amp;M</b>                      | Medicare Payments                      | 385.99                 | 1195.59        | 1206.20        | 2294.08        | <0.05 |
|                                     | Beneficiary Payments                   | 109.71                 | 314.43         | 331.83         | 598.17         | <0.05 |
|                                     | Other Payer Payments                   | 1.46                   | 56.42          | 2.26           | 72.53          | <0.05 |
|                                     | Events                                 | 4.95                   | 15.14          | 15.80          | 29.50          | <0.05 |
| <b>Part B Physician</b>             | Medicare Payments                      | 42.77                  | 133.33         | 452.64         | 1680.09        | <0.05 |
|                                     | Beneficiary Payments                   | 11.33                  | 35.20          | 116.57         | 431.84         | <0.05 |
|                                     | Other Payer Payments                   | 0.85                   | 36.52          | 0.90           | 88.80          | NS    |
|                                     | Events                                 | 0.32                   | 0.95           | 4.89           | 16.17          | <0.05 |
| <b>Anesthesia</b>                   | Medicare Payments                      | 11.50                  | 169.80         | 64.29          | 166.95         | <0.05 |
|                                     | Beneficiary Payments                   | 3.07                   | 45.41          | 16.82          | 43.63          | <0.05 |
|                                     | Other Payer Payments                   | 0.03                   | 8.21           | 0.70           | 36.25          | <0.05 |
|                                     | Events                                 | 0.07                   | 1.21           | 0.48           | 1.33           | <0.05 |
| <b>Dialysis</b>                     | Medicare Payments                      | 434.41                 | 1347.26        | 13.31          | 186.16         | <0.05 |
|                                     | Beneficiary Payments                   | 118.82                 | 348.74         | 3.50           | 48.98          | <0.05 |

|                                      |                                       |         |         |         |         |       |
|--------------------------------------|---------------------------------------|---------|---------|---------|---------|-------|
|                                      | <i>Other Payer Payments</i>           | 3.98    | 176.96  | 0.02    | 6.37    | NS    |
|                                      | <i>Events</i>                         | 4.74    | 12.65   | 0.09    | 1.44    | <0.05 |
| <b>Other Procedures</b>              | <i>Medicare Payments</i>              | 139.96  | 315.88  | 704.92  | 1586.76 | <0.05 |
|                                      | <i>Beneficiary Payments</i>           | 37.90   | 84.75   | 190.89  | 410.37  | <0.05 |
|                                      | <i>Other Payer Payments</i>           | 1.31    | 51.12   | 3.47    | 123.65  | <0.05 |
|                                      | <i>Events</i>                         | 3.22    | 5.83    | 9.35    | 20.08   | <0.05 |
| <b>Imaging</b>                       | <i>Medicare Payments</i>              | 197.36  | 429.77  | 225.62  | 343.96  | <0.05 |
|                                      | <i>Beneficiary Payments</i>           | 24.45   | 63.29   | 61.88   | 92.32   | <0.05 |
|                                      | <i>Other Payer Payments</i>           | 0.79    | 27.65   | 1.27    | 44.22   | <0.05 |
|                                      | <i>Events</i>                         | 10.71   | 18.48   | 6.21    | 8.09    | <0.05 |
| <b>Tests</b>                         | <i>Medicare Payments</i>              | 114.96  | 598.24  | 319.80  | 509.62  | <0.05 |
|                                      | <i>Beneficiary Payments</i>           | 33.26   | 162.70  | 41.02   | 86.21   | <0.05 |
|                                      | <i>Other Payer Payments</i>           | 0.32    | 31.54   | 0.92    | 30.71   | NS    |
|                                      | <i>Events</i>                         | 1.86    | 5.65    | 17.02   | 22.28   | <0.05 |
| <b>DME</b>                           | <i>Medicare Payments</i>              | 139.66  | 1092.81 | 221.87  | 833.61  | <0.05 |
|                                      | <i>Beneficiary Payments</i>           | 37.20   | 281.57  | 62.63   | 221.60  | <0.05 |
|                                      | <i>Other Payer Payments</i>           | 0.51    | 76.79   | 0.39    | 33.99   | NS    |
|                                      | <i>Events</i>                         | 1.79    | 10.33   | 3.34    | 7.47    | <0.05 |
| <b>Other Part B</b>                  | <i>Medicare Payments</i>              | 1231.57 | 4475.33 | 452.64  | 1680.09 | <0.05 |
|                                      | <i>Beneficiary Payments</i>           | 334.61  | 1132.90 | 116.57  | 431.84  | <0.05 |
|                                      | <i>Other Payer Payments</i>           | 21.23   | 3005.17 | 0.90    | 88.80   | <0.05 |
|                                      | <i>Events</i>                         | 5.49    | 15.53   | 4.89    | 16.17   | <0.05 |
| <b>Other Health Care Utilization</b> | <i>ED Visits w/ Discharge</i>         | 0.30    | 0.90    | 0.72    | 1.46    | <0.05 |
|                                      | <i>ED Visit w/ Admission</i>          | 0.16    | 0.56    | 0.46    | 0.94    | <0.05 |
|                                      | <i>Acute Inpatient Stays</i>          | 0.21    | 0.66    | 0.56    | 1.04    | <0.05 |
|                                      | <i>Other Inpatient Stays</i>          | 0.02    | 0.15    | 0.08    | 0.34    | <0.05 |
|                                      | <i>Skilled Nursing Facility Stays</i> | 0.07    | 0.34    | 0.29    | 0.70    | <0.05 |
|                                      | <i>Hospice Days</i>                   | 0.02    | 0.16    | 0.09    | 0.31    | <0.05 |
|                                      | <i>Hospital Readmissions</i>          | 0.03    | 0.27    | 0.10    | 0.44    | <0.05 |
| <b>Part D</b>                        | <i>Total Prescription Costs</i>       | 1407.97 | 5242.06 | 3235.70 | 6754.96 | <0.05 |
|                                      | <i>Medicare Payments</i>              | 980.79  | 4518.86 | 2303.10 | 5894.53 | <0.05 |
|                                      | <i>Beneficiary Payments</i>           | 318.94  | 1217.15 | 660.93  | 1590.85 | <0.05 |
|                                      | <i>Events</i>                         | 18.26   | 32.04   | 42.14   | 52.05   | <0.05 |
|                                      | <i>Fill Count</i>                     | 26.85   | 40.66   | 53.50   | 57.27   | <0.05 |

\*Comparison of group means with equal variance assumed, Bonferroni correction for multiple comparisons  
Abbreviations: NS= Not statistically significant, ED= Emergency Department
